# Supplementary material for: The Surgical and Therapeutic Activities of Non-Functional Pancreatic Neuroendocrine Tumors at a High-Volume Institution
Source: MDPI journal article supplement (doi:10.3390/cancers15071955), 2023-03-24
Supplement: s1 [file s1]

**Figure S1.** Kaplan-Meier survival curves of patients with small tumors. (A) Recurrence-free survival curve estimated by Kaplan-Meier methods. (B) Overall survival curve estimated by Kaplan-Meier methods. (C-D) Kaplan-Meier curves depicting recurrence-free survival and overall survival for patients with tumors  $>2$  cm or  $\leq 2$  cm.

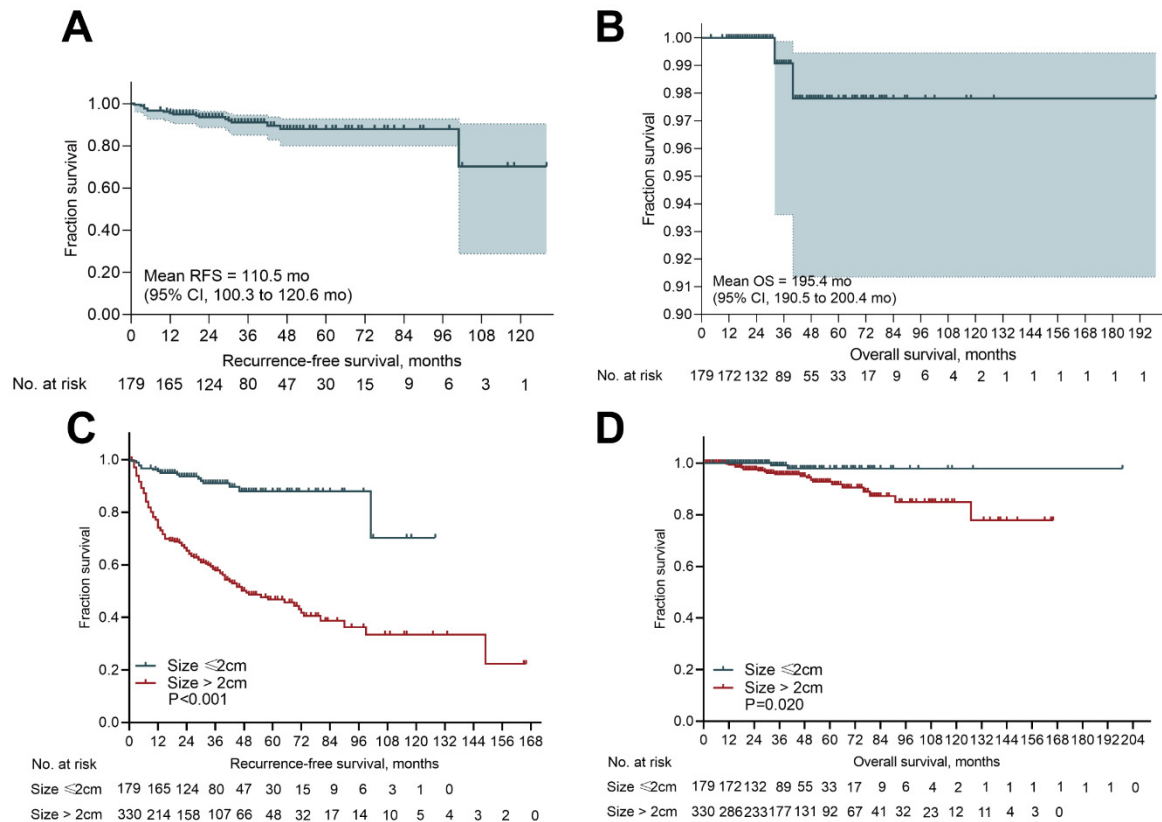

**Table S1.** Demographics and clinical characteristics of the non-metastatic and resected NF-PanNETs cohort during three periods

| Characteristics                  | 2006-2016<br>(n=171) | 2017-2018<br>(n=140) | 2019-2020<br>(n=153) | <i>P</i> -value  |
|----------------------------------|----------------------|----------------------|----------------------|------------------|
|                                  | No. (%)              | No. (%)              | No. (%)              |                  |
| <b>Gender</b>                    |                      |                      |                      | 0.863            |
| Male                             | 72 (42.1)            | 61 (43.6)            | 69 (45.1)            |                  |
| Female                           | 99 (57.9)            | 79 (56.4)            | 84 (54.9)            |                  |
| <b>Age, years, median</b>        | 54                   | 54                   | 53                   | 0.732            |
| <b>Tumor size, cm, Mean (SD)</b> | 4.0 (3.0)            | 3.3 (2.5)            | 3.0 (2.3)            | <b>0.006</b>     |
| <b>Location</b>                  |                      |                      |                      | 0.332            |
| Head                             | 41 (24.0)            | 49 (35.0)            | 40 (26.1)            |                  |
| Neck                             | 25 (14.6)            | 17 (12.1)            | 20 (13.1)            |                  |
| Body                             | 24 (14.0)            | 22 (15.7)            | 22 (14.4)            |                  |
| Tail                             | 34 (19.9)            | 15 (10.7)            | 19 (12.4)            |                  |
| Body-Tail                        | 39 (22.8)            | 32 (22.9)            | 43 (28.1)            |                  |
| Multifocal                       | 8 (4.7)              | 5 (3.6)              | 9 (5.9)              |                  |
| <b>Lymph node positive</b>       |                      |                      |                      | 0.374            |
| Yes                              | 35 (20.5)            | 33 (23.6)            | 26 (17.0)            |                  |
| No                               | 136 (79.5)           | 107 (76.4)           | 127 (83.0)           |                  |
| <b>Perineural invasion</b>       | n=164                | n=137                | n=152                | 0.123            |
| Yes                              | 28 (17.1)            | 33 (24.1)            | 23 (15.1)            |                  |
| No                               | 136 (82.9)           | 104 (75.9)           | 129 (84.9)           |                  |
| <b>Microvascular invasion</b>    | n=164                | n=137                | n=152                | <b>0.037</b>     |
| Yes                              | 30 (18.3)            | 42 (30.7)            | 41 (27.0)            |                  |
| No                               | 134 (81.7)           | 95 (69.3)            | 111 (73.0)           |                  |
| <b>Metastases</b>                |                      |                      |                      | 0.506            |
| Yes                              | 29 (17.0)            | 22 (15.7)            | 19 (12.4)            |                  |
| No                               | 142 (83.0)           | 118 (84.3)           | 134 (87.6)           |                  |
| <b>Surgical approach</b>         |                      |                      |                      | <b>&lt;0.001</b> |
| Open                             | 165 (96.5)           | 122 (87.1)           | 82 (53.6)            |                  |
| Minimally                        | 6 (3.5)              | 18 (12.9)            | 71 (46.4)            |                  |
| <b>Surgical procedure</b>        |                      |                      |                      | 0.258            |
| PD                               | 43 (25.1)            | 52 (37.1)            | 46 (30.1)            |                  |
| DP                               | 102 (59.6)           | 72 (51.4)            | 94 (61.4)            |                  |
| TP                               | 6 (3.5)              | 2 (1.4)              | 2 (1.3)              |                  |
| EN                               | 15 (8.8)             | 11 (7.9)             | 10 (6.5)             |                  |
| CP                               | 5 (2.9)              | 3 (2.1)              | 1 (0.7)              |                  |

|                                      |            |            |            |       |
|--------------------------------------|------------|------------|------------|-------|
| <b>Margin status</b>                 |            |            |            | 0.090 |
| R0                                   | 140 (81.9) | 113 (80.7) | 134 (87.6) |       |
| R1                                   | 2 (1.2)    | 5 (3.6)    | 0 (0.0)    |       |
| R2                                   | 29 (17.0)  | 22 (15.7)  | 19 (12.4)  |       |
| <b>AJCC 8<sup>th</sup> TNM stage</b> |            |            |            | 0.485 |
| I                                    | 43 (25.1)  | 40 (28.6)  | 52 (34.0)  |       |
| II                                   | 80 (46.8)  | 57 (40.7)  | 66 (43.1)  |       |
| III                                  | 19 (11.1)  | 21 (15.0)  | 16 (10.5)  |       |
| IV                                   | 29 (17.0)  | 22 (15.7)  | 19 (12.4)  |       |
| <b>WHO classification</b>            |            |            |            | 0.290 |
| G1                                   | 84 (49.1)  | 65 (46.4)  | 61 (39.9)  |       |
| G2                                   | 82 (48.0)  | 67 (47.9)  | 87 (56.9)  |       |
| G3                                   | 5 (2.9)    | 8 (5.7)    | 5 (3.3)    |       |

---

Note: SD: standard deviation; PD: pancreaticoduodenectomy; DP: distal pancreatectomy; TP: total pancreatectomy; EN: enucleation; CP: central pancreatectomy; AJCC: American Joint Committee on Cancer; WHO: World Health Organization.

---
